# Supplementary material for: Resistance of human glioblastoma multiforme cells to growth factor inhibitors is overcome by blockade of inhibitor of apoptosis proteins
Source: JCI journal article supplement (doi:10.1172/jci34120), 2008-08-01
Supplement: sd1 [file 1]

## Supplemental Figure 1

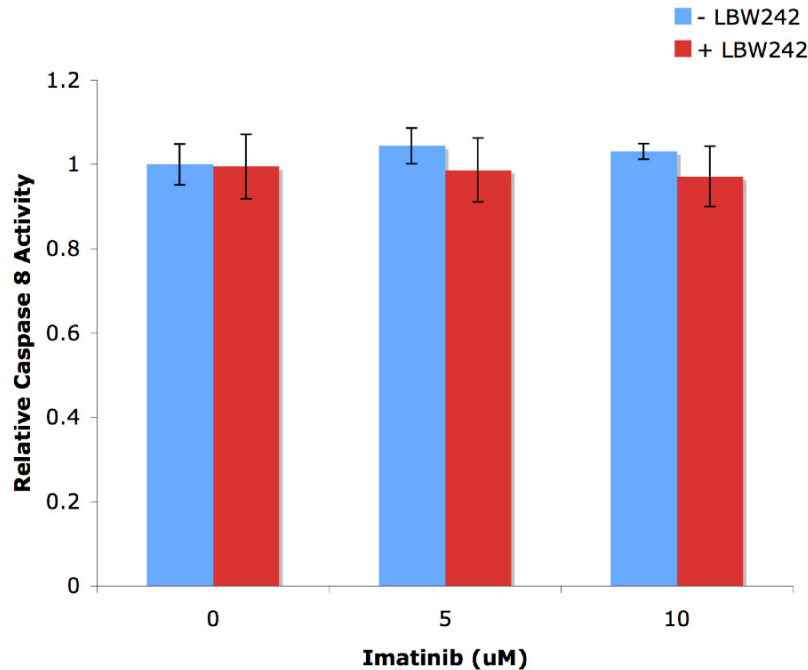

**Supplemental Figure 1. PDGFR and IAP inhibition do not activate the extrinsic pathway.** U87 cells were seeded in 96 well plates and treated with LBW242 (50  $\mu$ M) and / or imatinib at the concentrations indicated. After 48 hours incubation relative caspase 8 activity was measured via luminescent assay. No significant difference was seen between any of the treatment arms. Experiments were conducted in triplicate, with data expressed as mean  $\pm$  SEM.

## Supplemental Figure 2

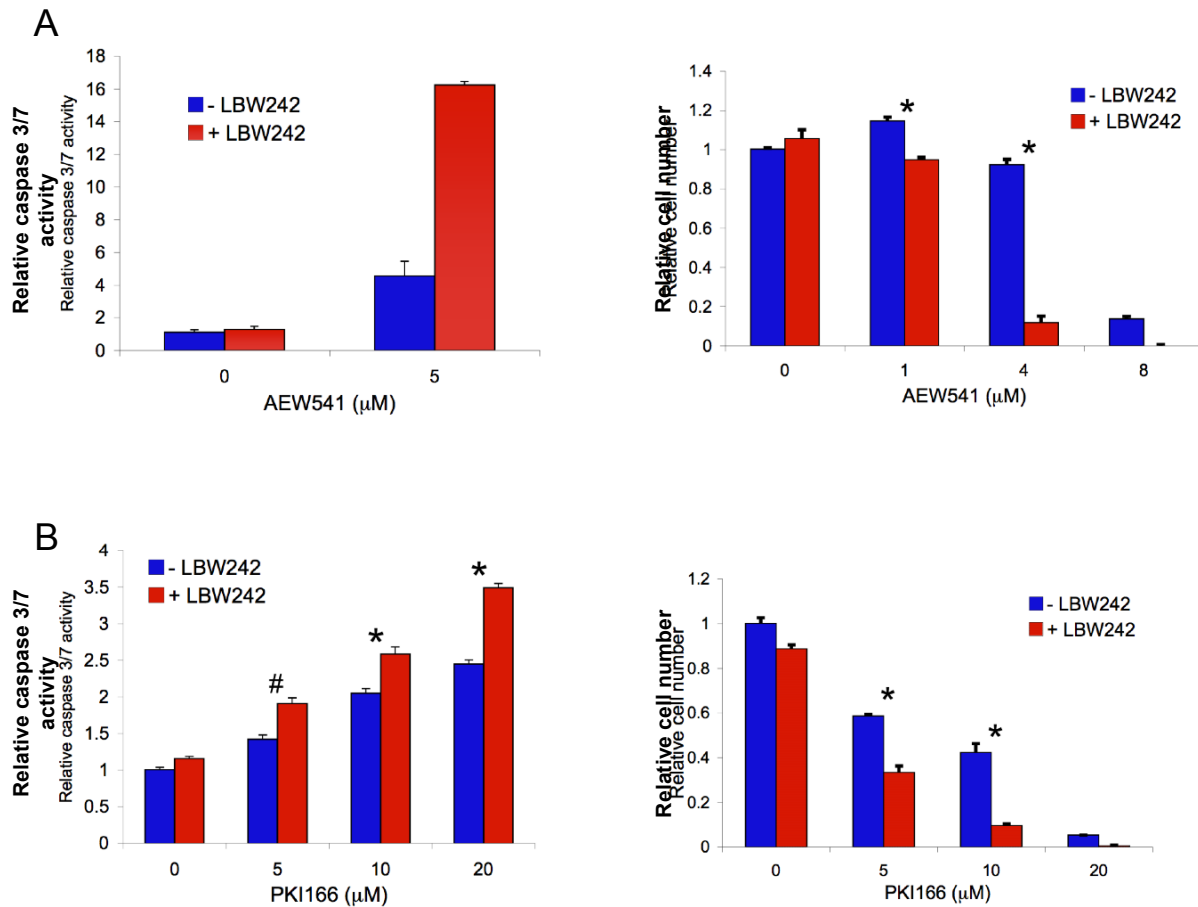

**Supplemental Figure 2. Synergistic induction of apoptosis by LBW242 in combination with IGF1R and EGFR inhibition.** LN827 cells were seeded in 96 well plates and treated with the IGF-1R inhibitor AEW541 (**A**) or the EGFR inhibitor PKI166 (**B**) at the concentrations indicated. Cells were also treated with either LBW242 (50  $\mu$ M) or DMSO as a control. After 72 hours incubation relative cell survival was measured by MTS assay and caspase 3/7 activity at 48 hours was measured via fluorescent assay. Experiments were conducted in triplicate, with data expressed as mean  $\pm$  SEM. \* $p < 0.001$  comparing results +/- LBW242, # $p < 0.01$  by Student's t-test (two-tailed).

## Supplemental Figure 3

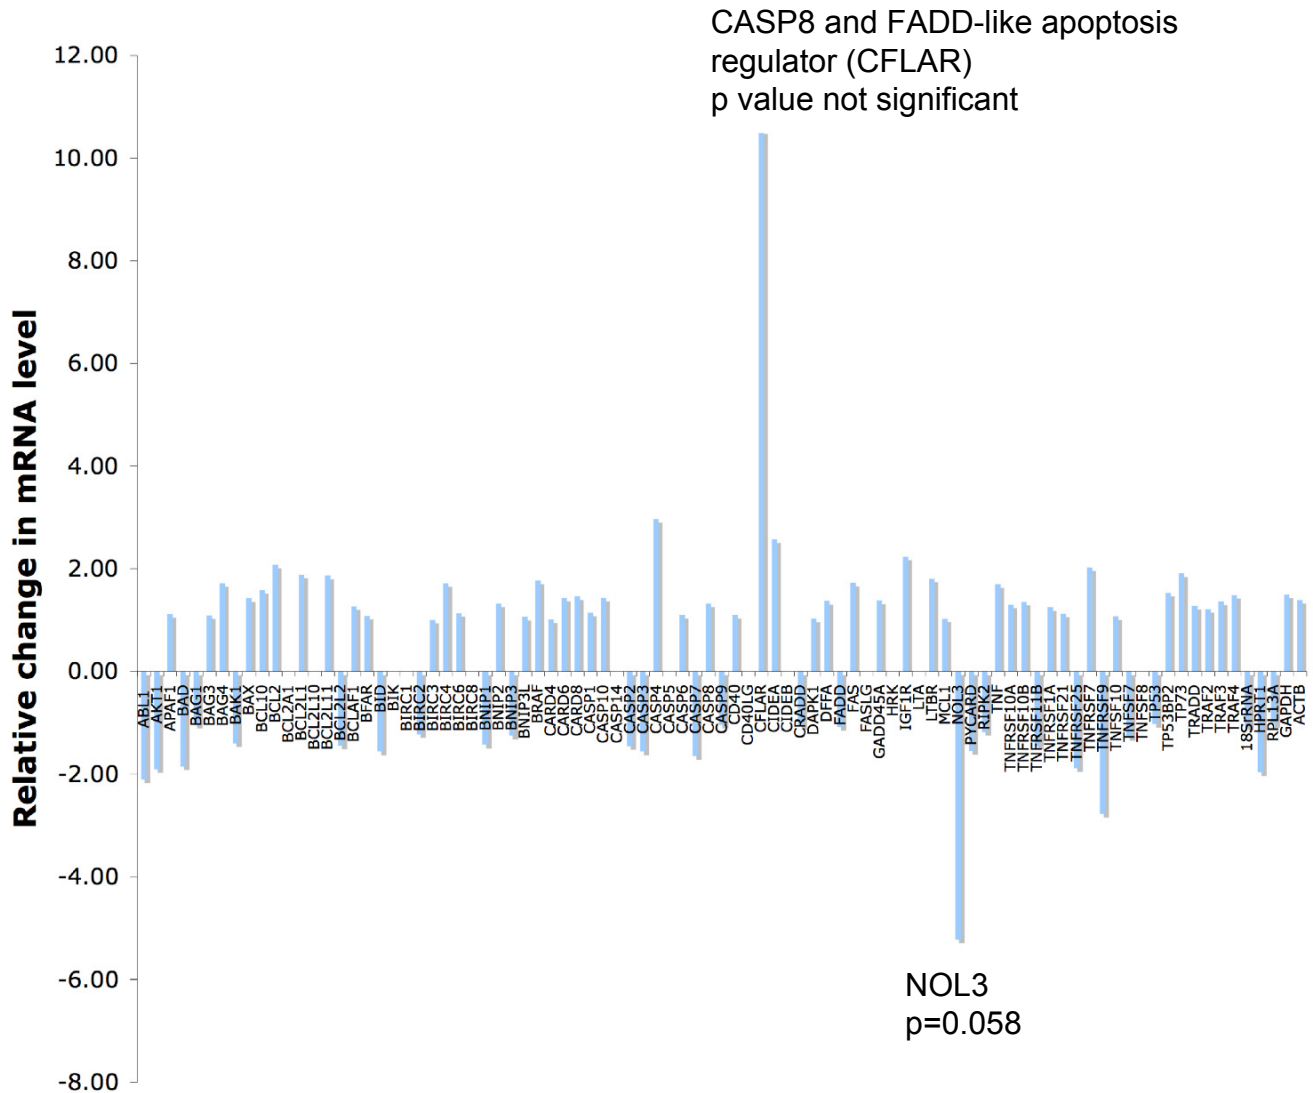

**Supplemental Figure 3. NOL3 expression is suppressed following administration of imatinib in LN827 cells.** Graph depicts results of multiplexed quantitative RT-PCR analysis of the indicated genes in the apoptosis pathway in LN827 cells. Data represents the average gene expression levels for 3 separate samples treated with or without imatinib, 10  $\mu$ M for 36 hours. Expression levels of CFLAR were highly erratic, and the apparent increase is not statistically significant. 4 independent follow-up experiments showed no significant change in CFLAR expression following treatment with imatinib (relative change -1.13, 1.05, 1.32 and 1.17)
